# Supplementary material for: Efficient identification and degradation of tetracycline hydrochloride from water by molecularly imprinted core–shell structured SiO2@TiO2
Source: Royal Society of Chemistry journal article supplement (doi:10.1039/d3nj01201h), 2023-01-01
Supplement: d3nj01201h1.pdf [file d3nj01201h1.pdf]

## Supplementary Information

### Efficient Identification and Degradation of Tetracycline Hydrochloride from Water by Molecularly Imprinted Core-Shell Structure SiO<sub>2</sub>@TiO<sub>2</sub>

Zimu Li,<sup>a</sup> Xicheng Li,<sup>a</sup> Shoufang Xu,<sup>\*b</sup> Hao Tian,<sup>a</sup> and Changzheng Wang<sup>\*a</sup>

1 Beijing Key Laboratory of Functional Materials for Building Structure and Environment Remediation, Beijing University of Civil Engineering and Architecture, Beijing, 100044, China. E-mail: changzhwang@163.com  
2 Laboratory of Functional Polymers, School of Materials Science and Engineering, Linyi University, Linyi 276005, China. E-mail: shfxu1981@163.com

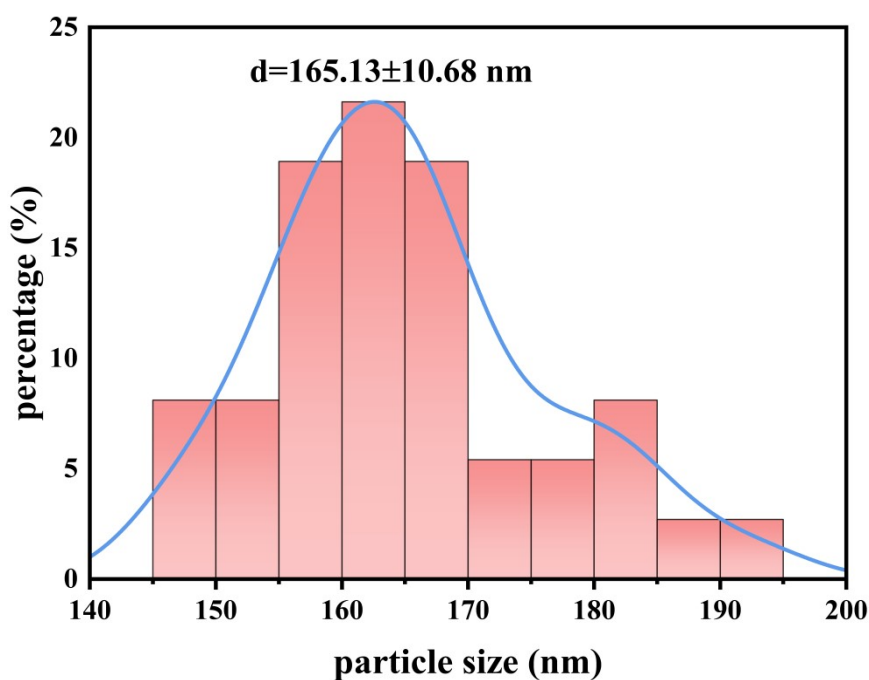

Fig. S1 The particle size distribution of SiO<sub>2</sub> (n=37)

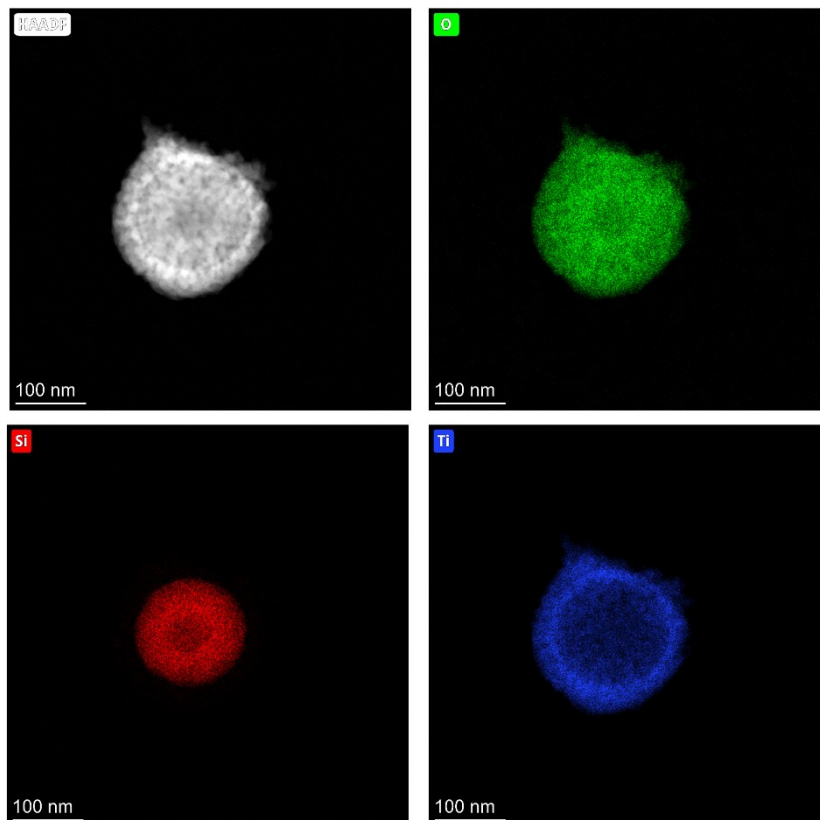

Fig. S2 Mapping of SiO<sub>2</sub>@TiO<sub>2</sub>@MIPs

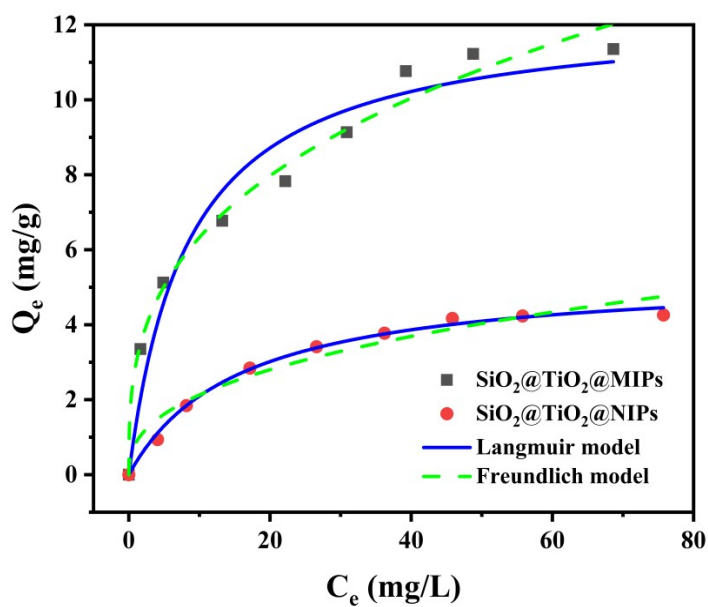

Fig. S3 Langmuir and Freundlich isotherm adsorption models fitting curve of SiO<sub>2</sub>@TiO<sub>2</sub>@MIPs and SiO<sub>2</sub>@TiO<sub>2</sub>@NIPs

The adsorption capacity ( $Q$ ) and imprinting factor ( $I^F$ ) are calculated as follows:

$$Q = \frac{(C_0 - C_t)V}{W}$$

$$IF = \frac{Q_{MIPs}}{Q_{NIPs}}$$

Where  $C_0$ (mg/L) is the initial concentration of TC;  $C_t$  is the concentration of TC after adsorption equilibrium; V(mL) is the volume of TC solution; W(g) is the mass of photocatalysts,  $Q_{MIPs}$ (mg/g) is the adsorption capacity of SiO<sub>2</sub>@TiO<sub>2</sub>@MIPs;  $Q_{NIPs}$ (mg/g) is the adsorption capacity of SiO<sub>2</sub>@TiO<sub>2</sub>@NIPs

The Langmuir isotherm adsorption models is a single molecular layer adsorption model with the following expressions:

$$Q_e = \frac{k_L Q_{max} C_e}{1 + k_L C_e}$$

Where  $C_e$ (mg/L) is the concentration of TC at the equilibrium state of adsorption;  $Q_e$ (mg/g) is the adsorption capacity of TC at the equilibrium state;  $Q_{max}$ (mg/g) is the theoretical maximum adsorption capacity; and  $k_L$ (mg/L) is the Langmuir adsorption constant.

Freundlich isotherm adsorption models is as follows:

$$Q_e = k_F C_e^{n_F}$$

Where  $C_e$ (mg/L) is the concentration of TC at the equilibrium state of adsorption;  $n_F$  and  $k_F$  are Freundlich constants.

**Table S1** Isotherm parameters of SiO<sub>2</sub>@TiO<sub>2</sub>@MIPs and SiO<sub>2</sub>@TiO<sub>2</sub>@NIPs

| Photocatalyst                            | Langmuir isotherm adsorption model |                             |       | Freundlich isotherm adsorption model |        |       |
|------------------------------------------|------------------------------------|-----------------------------|-------|--------------------------------------|--------|-------|
|                                          | $Q_{max}$ (mg·g <sup>-1</sup> )    | $k_L$ (mg·L <sup>-1</sup> ) | $R^2$ | $n_F$                                | $k_F$  | $R^2$ |
| SiO <sub>2</sub> @TiO <sub>2</sub> @MIPs | 12.358                             | 0.200                       | 0.901 | 2.940                                | -0.333 | 0.985 |
| SiO <sub>2</sub> @TiO <sub>2</sub> @NIPs | 5.375                              | 0.064                       | 0.989 | 0.851                                | -0.398 | 0.953 |

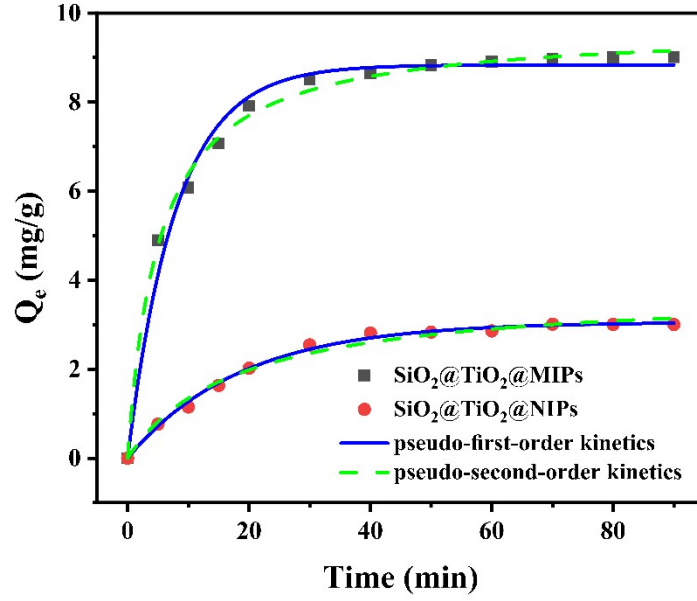

**Fig. S4** The pseudo-first-order kinetics and pseudo-second-order kinetics fitting curve of  $\text{SiO}_2@\text{TiO}_2@\text{MIPs}$  and  $\text{SiO}_2@\text{TiO}_2@\text{NIPs}$

The pseudo-first-order kinetics equation is expressed as:

$$\ln(Q_e - Q_t) = \ln Q_e - k_1 t$$

The pseudo-second-order kinetics equation is expressed as:

$$\frac{t}{Q_t} = \frac{1}{k_2 Q_e^2} + \frac{t}{Q_e}$$

Where  $Q_e(\text{mg/g})$  is the amount of adsorbate at equilibrium;  $Q_t(\text{mg/g})$  is the amount of adsorbate at any time;  $t$  (min) is adsorption time;  $k_1(\text{min}^{-1})$  is quasi-first-order kinetic adsorption constant;  $k_2(\text{g} \cdot (\text{mg} \cdot \text{min})^{-1})$  is quasi-second-order kinetic adsorption constant.

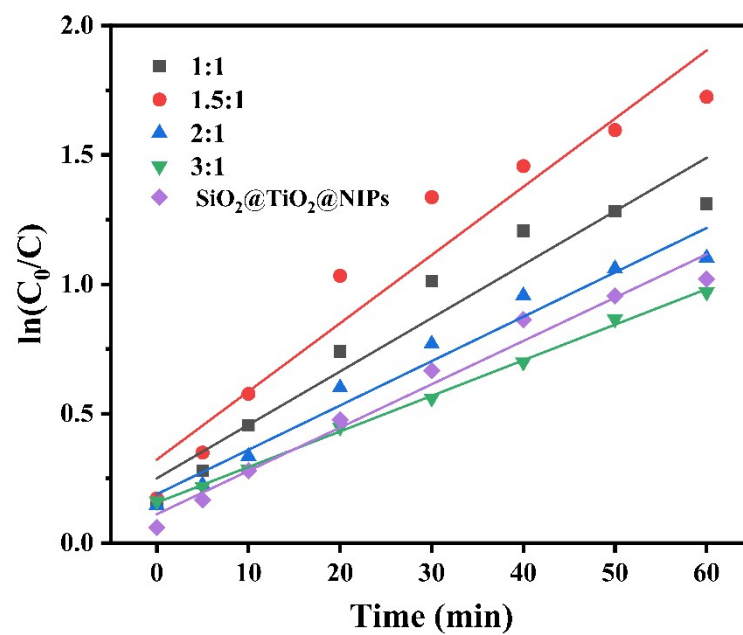

Fig. S5 Reaction kinetics of SiO<sub>2</sub>@TiO<sub>2</sub>@MIPs with different Ti/Si molar ratios

Table S2 The degradation rate constants of SiO<sub>2</sub>@TiO<sub>2</sub>@MIPs

| Photocatalyst                                | k (min <sup>-1</sup> ) |
|----------------------------------------------|------------------------|
| SiO <sub>2</sub> @TiO <sub>2</sub> @MIPs-1   | 0.021                  |
| SiO <sub>2</sub> @TiO <sub>2</sub> @MIPs-1.5 | 0.026                  |
| SiO <sub>2</sub> @TiO <sub>2</sub> @MIPs-2   | 0.017                  |
| SiO <sub>2</sub> @TiO <sub>2</sub> @MIPs-3   | 0.014                  |
| SiO <sub>2</sub> @TiO <sub>2</sub> @NIPs     | 0.017                  |

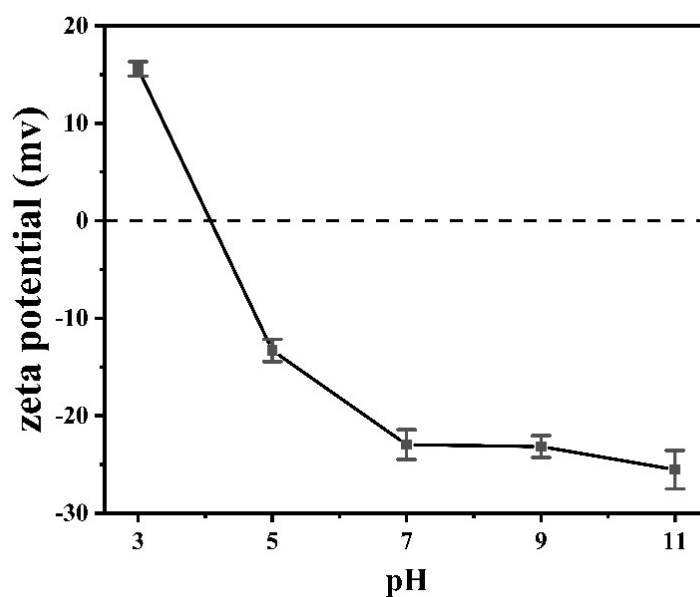

Fig. S5 Zeta potential of SiO<sub>2</sub>@TiO<sub>2</sub>@MIPs

Table S3 Comparison of MIP-coated photocatalysts for removal of organic pollutant

| Material                          | Templates                      | Synthesis method                       | k (min <sup>-1</sup> ) | Ref.      |
|-----------------------------------|--------------------------------|----------------------------------------|------------------------|-----------|
| TiO <sub>2</sub>                  | 2,4-dichlorophenoxyacetic acid | Sol-gel method                         | 0.0036                 | 1         |
| Pr-TiO <sub>2</sub>               | 2-sec-Butyl-4,6-dinitrophenol  | Solvothermal method                    | 0.0077                 | 2         |
| S-TiO <sub>2</sub>                | Salicylic acid                 | Surface molecular imprinting technique | 0.0071                 | 3         |
| NaCl/TiO <sub>2</sub>             | Ciprofloxacin                  | Surface molecular imprinting technique | 0.0100                 | 4         |
| TiO <sub>2</sub> /WO <sub>3</sub> | 2-nitrophenol                  | Sol-gel method                         | 0.0037                 | 5         |
| SiO <sub>2</sub> @TiO             | Tetracycline hydrochloride     | Sol-gel method                         | 0.026                  | This work |

**Table S4** Degradation rates of three antibiotics by SiO<sub>2</sub>@TiO<sub>2</sub>@MIPs and SiO<sub>2</sub>@TiO<sub>2</sub>@NIPs in simulated wastewater (n=3)

| Antibiotics | Degradation rate                                            | RSD                                            | Degradation rate                                            | RSD                                            |
|-------------|-------------------------------------------------------------|------------------------------------------------|-------------------------------------------------------------|------------------------------------------------|
|             | (SiO <sub>2</sub> @TiO <sub>2</sub> @MIPs) (% , average±SD) | (SiO <sub>2</sub> @TiO <sub>2</sub> @MIPs) (%) | (SiO <sub>2</sub> @TiO <sub>2</sub> @NIPs) (% , average±SD) | (SiO <sub>2</sub> @TiO <sub>2</sub> @NIPs) (%) |
| TC          | 78.27±1.70                                                  | 2.17                                           | 42.62±1.74                                                  | 4.08                                           |
| SMX         | 18.47±0.76                                                  | 4.13                                           | 25.15±1.13                                                  | 4.49                                           |
| DCF         | 15.57±0.73                                                  | 4.70                                           | 24.27±0.93                                                  | 3.84                                           |

**Table S5** Degradation rate of TC by SiO<sub>2</sub>@TiO<sub>2</sub>@MIPs with the addition of scavenger (n=3)

| Scavenger    | Degradation rate (% , average±SD) | RSD (%) |
|--------------|-----------------------------------|---------|
| No Scavenger | 82.17±1.41                        | 1.72    |
| BQ           | 41.67±1.91                        | 4.58    |
| AO           | 22.73±1.11                        | 4.88    |
| IPA          | 59.27±1.40                        | 2.36    |

**Table S6** Degradation rate of TC by SiO<sub>2</sub>@TiO<sub>2</sub>@MIPs in five cycles (n=3)

| Cycles | Degradation rate (% , average±SD) | RSD (%) |
|--------|-----------------------------------|---------|
| 1      | 82.36±1.21                        | 1.47    |
| 2      | 81.28±1.13                        | 1.39    |
| 3      | 80.84±1.29                        | 1.59    |
| 4      | 80.04±1.22                        | 1.52    |
| 5      | 79.15±1.48                        | 1.87    |

## References

1. R. Fiorenza, A. Di Mauro, M. Cantarella, C. Iaria, E. M. Scalisi, M. V. Brundo, A. Gulino, L. Spitaleri, G. Nicotra, S. Dattilo, S. C. Carroccio, V. Privitera and G. Impellizzeri, *Chem. Eng. J.*, 2020, **379**, 122309.
2. H. P. Qi, H. L. Wang, *Appl. Surf. Sci.*, 2020, **511**, 145607.
3. Z. Q. Wang, X. Liu, W. Q. Li, H. Y. Wang, H. X. Li, *Ceram. Int.*, 2014, **40**, 8863-8867.
4. X. L. Liu, P. Lv, G. X. Yao, C. C. Ma, Y. F. Tang, Y. Wu, P. W. Huo, J. M. Pan, W. D. Shi and Y. S. Yan, *Colloids Surf., A*, 2014, **441**, 420-426.
5. X. Luo, F. Deng, L. Min, S. Luo, B. Guo, G. Zeng and C. Au, *Environ. Sci. Technol.*, 2013, **47**, 7404-7412.
